# Supplementary material for: Towards a multi-arm multi-stage platform trial of disease modifying approaches in Parkinson’s disease
Source: PubMed Central journal article supplement — Brain. 2023 Feb 28;146(7):2717–22. doi: 10.1093/brain/awad063 (PMC10316775; doi:10.1093/brain/awad063), 2023-02-28
Supplement: awad063_supplementary_data.pdf [file awad063_supplementary_data.pdf]

| Member:                   | Role:           | Organisation                                                                                                  | Email                                                      |
|---------------------------|-----------------|---------------------------------------------------------------------------------------------------------------|------------------------------------------------------------|
| Yoav Ben Shlomo           | Member          | University of Bristol,<br>Bristol, UK                                                                         | Y.Ben-Shlomo@bristol.ac.uk                                 |
| Mark Edwards              | Member          | St George's University of<br>London, London, UK                                                               | medwards@sgul.ac.uk                                        |
| Alan Whone                | Member          | University of Bristol,<br>Bristol, UK                                                                         | Alan.Whone@bristol.ac.uk                                   |
| Carl Counsell             | Member          | University of Bristol,<br>Bristol, UK                                                                         | carl.counsell@abdn.ac.uk                                   |
| Caroline Clarke           | Member          | University College<br>London, London, UK                                                                      | caroline.clarke@ucl.ac.uk                                  |
| Matthew Burnell           | Member          | MRC Clinical Trials Unit at<br>UCL, London, UK.                                                               | m.burnell@ucl.ac.uk                                        |
| Dorothy Salathiel         | PPI             | Expert by Experience                                                                                          | dorothy.sm99@gmail.com                                     |
| Sue Whipps                | PPI             | Expert by Experience                                                                                          | sue.whipps@btinternet.com                                  |
| Anna Jewell               | PPI             | Expert by Experience                                                                                          | anna.lgjewell@gmail.com                                    |
| Tom Barber                | ECR             | University of Oxford,<br>Oxford, UK                                                                           | Tom.Barber@ouh.nhs.uk                                      |
| Rimona Weil               | Deputy<br>Chair | University College<br>London, London, UK                                                                      | r.weil@ucl.ac.uk                                           |
| Caroline Williams<br>Gray | Member          | University of Cambridge,<br>UK                                                                                | chm27@cam.ac.uk                                            |
| Michele Hu                | Member          | University of Oxford,<br>Oxford, UK                                                                           | michele.hu@ndcn.ox.ac.uk                                   |
| Lynn Rochester            | Member          | Newcastle University,<br>Newcastle, UK                                                                        | lynn.rochester@newcastle.ac.uk                             |
| Paola Piccini             | Member          | Imperial College London,<br>London UK                                                                         | paola.piccini@imperial.ac.uk                               |
| Henrik Zetterberg         | Member          | University College<br>London, London, UK /<br>The Sahlgrenska<br>Academy, University of<br>Gothenburg, Sweden | h.zetterberg@ucl.ac.uk                                     |
| Alastair Noyce            | Member          | Queen Mary University of<br>London, London UK                                                                 | <a href="mailto:a.noyce@qmul.ac.uk">a.noyce@qmul.ac.uk</a> |
| Ray Chaudhuri             | Member          | King's College London,<br>London, UK                                                                          | ray.chaudhuri@kcl.ac.uk                                    |
| Michael Lawton            | Member          | University of Bristol,<br>Bristol, UK                                                                         | Michael.Lawton@bristol.ac.uk                               |
| Ashwani Jha               | Member          | University College<br>London, London, UK                                                                      | ashwani.jha@ucl.ac.uk                                      |
| Carroll Siu               | PPI             | Expert by Experience                                                                                          | carrollsiu@gmail.com                                       |
| Michèle Bartlett          | PPI             | Expert by Experience                                                                                          | hello@michelebartlett.co.uk                                |
| Daniel van<br>Wamelen     | ECR             | King's College London,<br>London, UK                                                                          | daniel.van_wamelen@kcl.ac.uk                               |
| Simon Stott               | Member          | Cure Parkinson's,<br>London, UK                                                                               | simon@cureparkinsons.org.uk                                |
| George Tofaris            | Member          | University of Oxford,<br>Oxford, UK                                                                           | george.tofaris@ndcn.ox.ac.uk                               |

|                         |        |                                                                               |                                        |
|-------------------------|--------|-------------------------------------------------------------------------------|----------------------------------------|
| Esther Sammler          | Member | University of Dundee,<br>Dundee, UK                                           | e.m.sammler@dundee.ac.uk               |
| Heather Mortiboys       | Member | University of Sheffield,<br>Sheffield, UK                                     | h.mortiboys@sheffield.ac.uk            |
| Li Wei                  | Member | University College<br>London, London, UK                                      | l.wei@ucl.ac.uk                        |
| Alan Wong               | Member | Royal Free Hospital NHS<br>Foundation Trust,<br>London, UK                    | alan.wong@nhs.net                      |
| Susan Duty              | Member | King's College London,<br>London, UK                                          | susan.duty@kcl.ac.uk                   |
| David Dexter            | Member | Parkinson's UK, London,<br>UK                                                 | ddexter@parkinsons.org.uk              |
| Paula Scurfield         | PPI    | Expert by Experience                                                          | paula_scurfield@hotmail.com            |
| Edwin Jabbari           | ECR    | University College<br>London, London, UK                                      | e.jabbari@ucl.ac.uk                    |
| Huw Morris              | Member | University College<br>London, London, UK                                      | huwmorris@gmail.com                    |
| David Breen             | Member | University of Edinburgh,<br>Edinburgh, UK                                     | David.Breen@nhslothian.scot.nhs.uk     |
| Chris Lambert           | Member | University College<br>London, London, UK                                      | clambert112358@gmail.com               |
| Prasad Korlipara        | Member | University College<br>London, London, UK                                      | l.korlipara@ucl.ac.uk                  |
| Monty Silverdale        | Member | University of<br>Manchester,<br>Manchester, UK                                | monty.silverdale@nca.nhs.uk            |
| Kailash Bhatia          | Member | University College<br>London, London, UK                                      | k.bhatia@ucl.ac.uk                     |
| Alison Yarnall          | Member | Newcastle University,<br>Newcastle, UK                                        | alison.yarnall@newcastle.ac.uk         |
| Raj Khengar             | Member | University College<br>London, London, UK                                      | r.khengar@ucl.ac.uk                    |
| Helen Collins           | Member | Nat National Institute of<br>Health Research Clinical<br>Research Network, UK | Helen.Collins@ouh.nhs.uk               |
| Fleur Hudson            | Member | MRC Clinical Trials Unit at<br>UCL, London, UK.                               | f.hudson@ucl.ac.uk                     |
| Gareth Baxendale        | Member | National Institute of<br>Health Research Clinical<br>Research Network, UK     | gareth.baxendale@nihr.ac.uk            |
| Rebecca Croucher        | Member | National Institute of<br>Health Research Clinical<br>Research Network, UK     | rebecca.croucher@nihr.ac.uk            |
| Sandra Bartolomeu-Pires | Member | Southampton NHS<br>Foundation Trust,<br>Southampton, UK                       | Sandra.Bartolomeu-<br>Pires@uhs.nhs.uk |
| Jennifer Allison        | Member | National Institute of<br>Health Research Clinical<br>Research Network, UK     | jennifer.allison@nihr.ac.uk            |
| Antony Morgan           | PPI    | Expert by Experience                                                          | antony.morgan@gcu.ac.uk                |

|                           |              |                                                                                                                                                 |                                |
|---------------------------|--------------|-------------------------------------------------------------------------------------------------------------------------------------------------|--------------------------------|
| Sheila Wonnacott          | PPI          | Expert by Experience                                                                                                                            | wonnacott69@gmail.com          |
| Dilan Athauda             | ECR          | University College<br>London, London, UK                                                                                                        | d.athauda@ucl.ac.uk            |
| Emily Henderson           | Member       | University of Bristol,<br>Bristol, UK                                                                                                           | emily.henderson@bristol.ac.uk  |
| Shona Clegg               | Member       | Parkinson's UK, London,<br>UK                                                                                                                   | sclegg@parkinsons.org.uk       |
| Karen Matthews            | Member       | National Institute of<br>Health Research Clinical<br>Research Network, UK                                                                       | karen.l.matthews@nih.ac.uk     |
| Eric Deeson               | PPI          | Expert by Experience                                                                                                                            | ericdeeson@aol.com             |
| Laurel Miller             | PPI          | Expert by Experience                                                                                                                            | laurelmliller@gmail.com        |
| Joel Handley              | ECR          | Salford Royal NHS<br>Foundation Trust, UK                                                                                                       | joelhandley@doctors.org.uk     |
| Helen Matthews            | Member       | Cure Parkinson's,<br>London, UK                                                                                                                 | helen@cureparkinsons.org.uk    |
| Amit Batla                | Member       | University College<br>London, London, UK                                                                                                        | a.batla@ucl.ac.uk              |
| Nikul Bakshi              | Member       | Parkinson's UK, London,<br>UK                                                                                                                   | nbakshi@parkinsons.org.uk      |
| Beckie Port               | Member       | Parkinson's UK, London,<br>UK                                                                                                                   | rport@parkinsons.org.uk        |
| Romy Ellis-Doyle          | Member       | University College<br>London, London, UK                                                                                                        | r.ellis-doyle@ucl.ac.uk        |
| Sally L Collins           | Member       | University of Plymouth,<br>Plymouth, UK                                                                                                         | sally.l.collins@plymouth.ac.uk |
| Judith Rudiger            | Member       | University of Plymouth,<br>Plymouth, UK                                                                                                         | judith.rudiger@plymouth.ac.uk  |
| Rebecca<br>Chapman        | Member       | University of Plymouth,<br>Plymouth, UK                                                                                                         | rebecca.chapman@plymouth.ac.uk |
| Jesse Cedarbaum           | AG Chair     | Yale University,<br>Connecticut, USA                                                                                                            | Dr.C@coclinsci.com             |
| Anthony Lang              | AG<br>member | University of Toronto,<br>Ontario, Canada                                                                                                       | Anthony.Lang@uhnresearch.ca    |
| Brain Fiske               | AG<br>member | Michael J. Fox<br>Foundation, New York,<br>USA                                                                                                  | bfiske@michaeljfox.org         |
| Richard Wyse              | AG<br>member | Cure Parkinson's,<br>London, UK                                                                                                                 | richard@cureparkinsons.org.uk  |
| Adam Boxer                | AG<br>member | University of California,<br>San Francisco, California,<br>USA                                                                                  | adam.boxer@ucsf.edu            |
| Denise Wilson             | AG<br>member | National Institute of<br>Health Research Clinical<br>Research Network, UK                                                                       | denise.wilson@nih.ac.uk        |
| Jean Christophe<br>Corvol | AG<br>member | Pitié-Salpêtrière Hospital,<br>Sorbonne University,<br>Assistance Publique<br>Hôpitaux de Paris, Brain<br>and Spine Institute, Paris,<br>France | jean-christophe.corvol@aphp.fr |

|                 |              |                                                                           |                     |
|-----------------|--------------|---------------------------------------------------------------------------|---------------------|
| Jennifer Harris | AG<br>member | National Institute of<br>Health Research Clinical<br>Research Network, UK | JHarris@abpi.org.uk |
|-----------------|--------------|---------------------------------------------------------------------------|---------------------|
